# Supplementary material for: Synthesis, structure and valence-trapping vs. detrapping for new trinuclear iron pentafluoro benzoate complexes: possible recognition of organic molecules by 57Fe Mössbauer spectroscopy
Source: Royal Society of Chemistry journal article supplement (doi:10.1039/c3dt53623h), 2014-01-01
Supplement: c3dt53623h1.pdf [file c3dt53623h1.pdf]

† Electronic supplementary information (ESI):

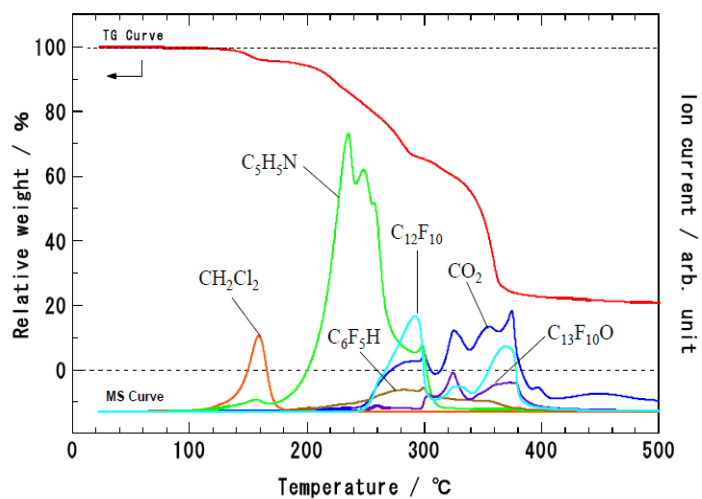

Fig. S1. TG-MS spectrum of **1**.

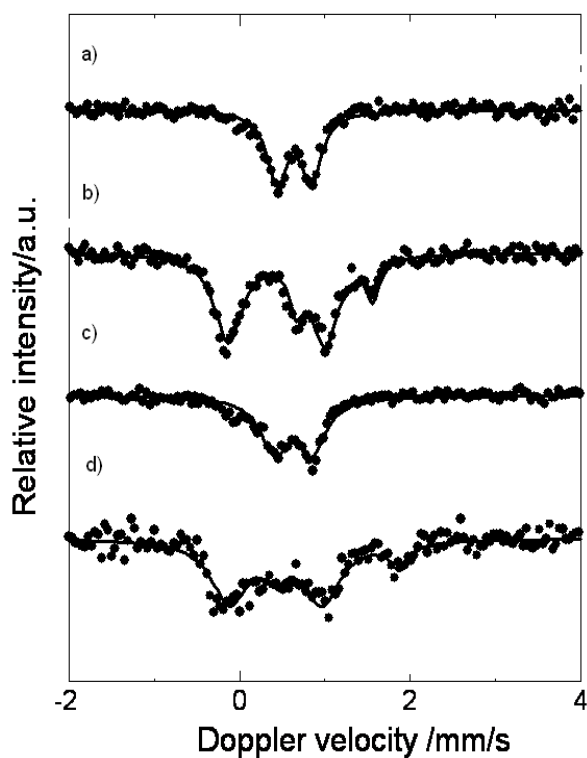

Fig. S2.  $^{57}\text{Fe}$  Mössbauer spectral study on adduct loss/addition cycles; a) chemically synthesized **1**; b)  $\text{CH}_2\text{Cl}_2$ -stripped **2** by heating **1** under a reduced pressure described in the text; c) product after exposure of **2** with  $\text{CH}_3\text{CN}$  vapour for 4 hr; d) product after heating the sample **2**· $\text{CH}_3\text{CN}$  (Fig. S2c) at  $135^\circ\text{C}$  under a reduced pressure (0.1 Torr).
